# Supplementary material for: Anti-atherogenic Modification of Serum Lipoprotein Function in Patients with Rheumatoid Arthritis after Tocilizumab Treatment, a Pilot Study
Source: MDPI journal article supplement (doi:10.3390/jcm9072157), 2020-07-08
Supplement: s1 [file s1]

Table S1: Baseline demographic and clinical characteristics of patients with established rheumatoid arthritis starting tocilizumab.

|                                                                              | Patients (n=8) |
|------------------------------------------------------------------------------|----------------|
| Female % (n)                                                                 | 88 (7)         |
| Median age in years [IQR]                                                    | 61 [55-65]     |
| Median disease duration in years [IQR]                                       | 15.5 [14-24.8] |
| Median DAS28 [IQR]                                                           | 3.5 [2.9-4.3]  |
| Smoking habit % (n)                                                          | 38 (3)         |
| RF positivity % (n)                                                          | 88 (7)         |
| ACPA positivity % (n)                                                        | 75 (6)         |
| Median number of previous biologic drugs [IQR]                               | 2.5 [2-4]      |
| Median weeks of wash-out before starting tocilizumab [IQR]                   | 7 [5-17]       |
| Patients treated with daily equivalent prednisone dose $\geq 5$ mg/day % (n) | 75 (6)         |
| Median prednisone daily dose [IQR]                                           | 5 [4.4-7.5]    |

ACPA anti-citrullinated peptide antibodies; DAS28 disease activity 28 joints; IQR interquartile range; RF rheumatoid factors

Table S2: Lipid profile of patients with established rheumatoid arthritis before and after 12 weeks from starting tocilizumab treatment.

|                                      | Baseline      | After 12 weeks |
|--------------------------------------|---------------|----------------|
| Median total cholesterol mg/dL [IQR] | 220 [206-239] | 231 [228-252]  |
| Median HDL mg/dL [IQR]               | 62 [57-76]    | 66 [60-79]     |
| Median LDL mg/dL [IQR]               | 132 [125-146] | 161 [144-179]* |
| Median TGL mg/dL [IQR]               | 128 [90-178]  | 151 [93-186]   |

TGL triglycerides; HDL high density lipoprotein; IQR interquartile range; LDL low density lipoprotein; \*p=0.028 vs baseline.
